# Supplementary material for: All solid state electrochromic devices based on the LiF electrolyte
Source: Royal Society of Chemistry journal article supplement (doi:10.1039/d0cc00697a), 2020-01-01
Supplement: d0cc00697a1.pdf [file d0cc00697a1.pdf]

## Supporting Information

### All Solid State Electrochromic Devices Based on LiF Electrolyte

*Xi Chen<sup>a</sup>, Shuliang Dou<sup>a</sup>, Wenjie Li<sup>b</sup>, Dongqi Liu<sup>c</sup>, Yongfu Zhang<sup>d</sup>, Yingming Zhao<sup>a</sup>, Yao Li<sup>a\*</sup>, Jiupeng Zhao<sup>b</sup> and Xiang Zhang<sup>a\*</sup>*

*<sup>a</sup> National Key Laboratory of Science and Technology on Advanced Composites in Special Environments, Harbin Institute of Technology, Harbin 150001, PR China.*

*<sup>b</sup> School of Chemistry and Chemical Engineering, Harbin Institute of Technology, Harbin, 150001, PR China.*

*<sup>c</sup> University of Bayreuth, Universitätsstraße 30, 95447, Bayreuth, Germany.*

*<sup>d</sup> Zhejiang Sunflux Electron CO., LTD, Shaoxing Zhejiang 312366, PR China*

*\*Corresponding author.*

E-mail: yaoli@hit.edu.cn (Yao Li); zhangxhit@hit.edu.cn(Xiang Zhang).

#### **Content:**

1. Experimental Section.
2. The corresponding chronoamperometry (CA).
3. Digital photos of ECD at different stage.
4. The corresponding current density curve.
5. Reported performance of all solid state electrochromic devices.
6. The first two cycles full coloring /bleaching CA.
7. Reference.

## Experimental Section

### Preparation of films and ECD

The indium tin oxide glass(ITO glass, 3 cm \* 4 cm, 10  $\Omega$ /square) and quartz glass substrates were obtained from Ningbo Nanotech Advanced Materials Co., Ltd. The substrates were ultrasonically cleaned in deionized water and alcohol for 10 min, respectively. All evaporation particles ( $\text{WO}_3$ , LiF, NiO and ITO) were 1~3 mm in diameter and obtained from ZhongNuo Advanced Material (Beijing) Technology Co., Ltd. The basic pressure of the deposition chamber was  $5.0 \times 10^{-4}$  Pa. The distance between substrate and the evaporation source was 25 cm.

The  $\text{WO}_3$ , NiO and top ITO films were deposited by electron beam evaporation and LiF thin film was deposited by resistance evaporation method. The deposition conditions of the thin films are listed in Table S1. All single layer films were fabricated on the quartz glasses to study the morphology, structural, and optical properties. The ECDs with the structure of Glass/ITO/ $\text{WO}_3$ /LiF/NiO/ITO were fabricated on the ITO glasses using the same evaporation parameters listed in Table S1. The effective EC area of ECDs is about 2 cm \* 3 cm. After evaporation, in order to enhance the optical and electrical properties of the top ITO thin film, the ECD was annealed at 300 °C for 60 min in a muffle furnace. All single layer films were also annealed at the same conditions to match their properties in the device.

Table S1 Deposition conditions for the thin films

| Film          | Thickness(nm) | Working vacuum(Pa)   | Deposition rate( $\text{\AA}$ /s) |
|---------------|---------------|----------------------|-----------------------------------|
| $\text{WO}_3$ | 450           | $1.8 \times 10^{-3}$ | 1.5                               |
| LiF           | 90            | $6.8 \times 10^{-4}$ | 1.0                               |

---

|     |     |                      |     |
|-----|-----|----------------------|-----|
| NiO | 250 | $2.5 \times 10^{-3}$ | 1.5 |
| ITO | 150 | $1.1 \times 10^{-3}$ | 1.5 |

---

### Characterizations

The morphologies of the samples were characterized by scanning electron microscopy (SEM) using a Zeiss supra 55 at an accelerating voltage of 20 kV. The crystalline structures of the films were characterized by Japan Rigaku DMax-rb rotation anode X-ray diffractometer equipped with graphite monochromatized Cu  $K_{\alpha}$  radiation (0.15418 nm) in the range from 10° to 80°. The transmittance spectra of the samples were characterized by Vis-NIR fiber optic spectrometer (MAYA 2000-Pro, Ocean Optics).

The EC performances of the devices were investigated with the combination of CHI 660E electrochemical station and Vis-NIR fiber optic spectrometer. The cyclic voltammetry (CV) measurement of the devices were performed at a scan rate of 50 mV/s over the voltage range of -2.5~2.5 V. The chronoamperometry (CA) measurement of the devices were performed by applying -2.5 V and 2.5 V with 15 s duration. In order to obtain the maximum reversible spectra modulations, the devices were colored at -2.5 V for 100 s and bleached at 2.5 V for 40 s.

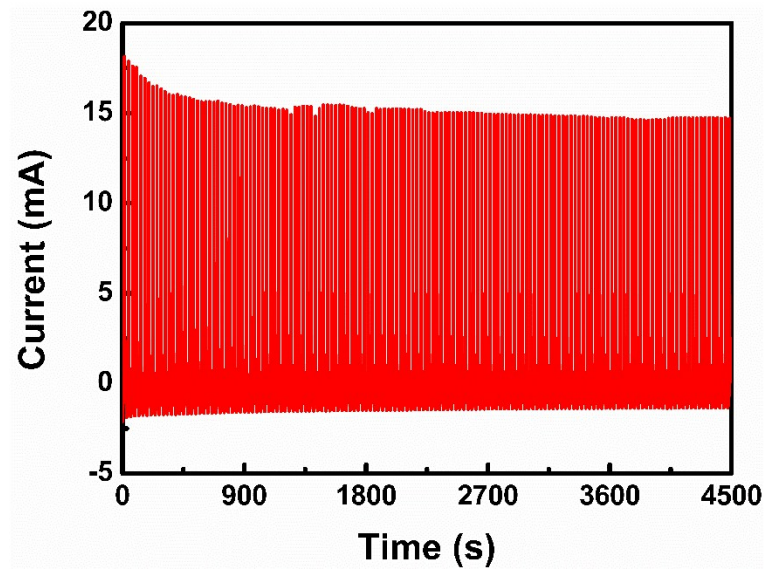

Figure S1 The corresponding chronoamperometry (CA). The corresponding CA measurements of the device are performed by applying  $-2.5$  V and  $+2.5$  V with 15 s duration.

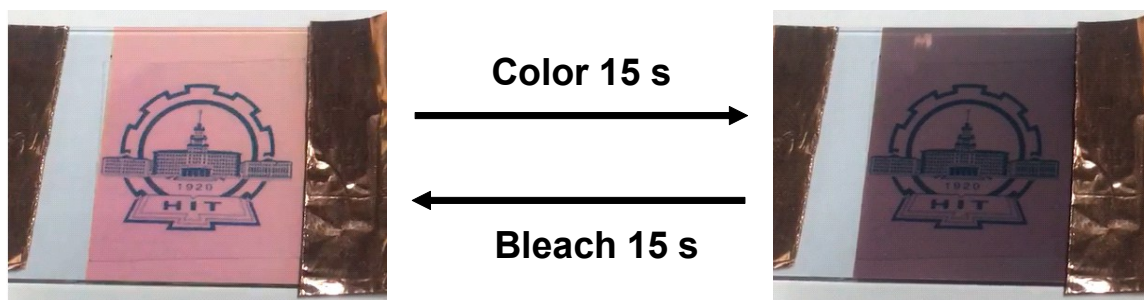

Figure S2 Digital photos of ECD at different stages.

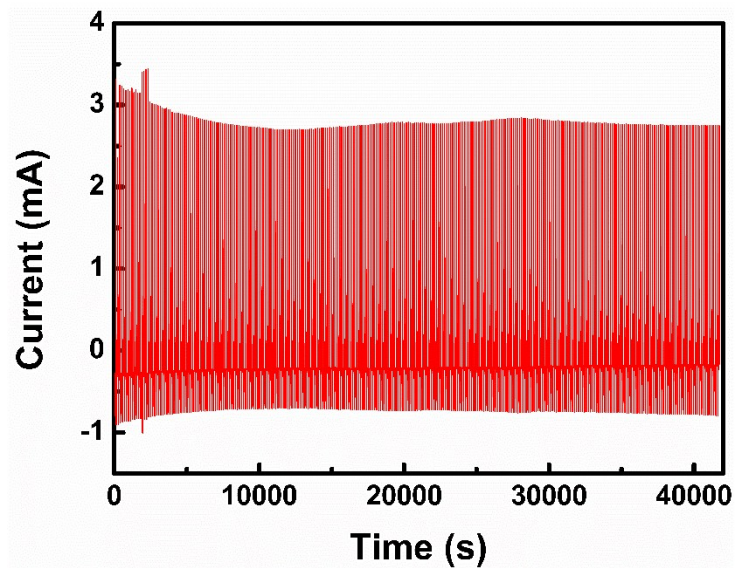

Figure S3 The corresponding current density curve. The corresponding current density curve extend the coloring time to 100 s and the bleaching time to 40 s

Table S2 Reported performance of all solid state electrochromic devices.

| Device structure                                                                                                                     | $t_c / t_b$ (s) | $\Delta T_{max}$ (%) | CE (cm <sup>2</sup> /C) | Ref.      |
|--------------------------------------------------------------------------------------------------------------------------------------|-----------------|----------------------|-------------------------|-----------|
| Glass/ITO/NiO <sub>x</sub> /LiBSO/WO <sub>3</sub> /ITO                                                                               | 20 / 8          | 52.2*                | NG                      | S1        |
| Glass/ITO/MoO <sub>3</sub> /LiAlO <sub>2</sub> /NiO <sub>x</sub> /ITO                                                                | NG              | 43.2*                | NG                      | S2        |
| Glass/ITO/MoO <sub>3</sub> /LiBSO/NiO <sub>x</sub> /ITO                                                                              | NG              | 46.5                 | NG                      | S3        |
| PET/ITO/NiO <sub>x</sub> /LiTaO <sub>3</sub> /WO <sub>3</sub> /ITO                                                                   | 7 / 55          | 63                   | 68.5                    | S4        |
| Glass/ITO/NiO <sub>x</sub> /Ta <sub>2</sub> O <sub>5</sub> /LiNbO <sub>3</sub> /Ta <sub>2</sub> O <sub>5</sub> /WO <sub>3</sub> /ITO | 21 / 21         | 52.5                 | 98.1                    | S5        |
| Glass/ITO/NiO/Si <sub>3</sub> N <sub>4</sub> /LiNbO <sub>3</sub> /Si <sub>3</sub> N <sub>4</sub> /WO <sub>3</sub> /ITO               | within 30       | 43                   | NG                      | S6        |
| Glass/ITO/NiO <sub>x</sub> /Ta <sub>2</sub> O <sub>5</sub> :H/WO <sub>3</sub> /ITO                                                   | within 40       | 60                   | NG                      | S7        |
| Glass/ITO/NiO <sub>x</sub> :H/ZrO <sub>2</sub> /WO <sub>3</sub> /ITO                                                                 | 70 / 42         | 68                   | NG                      | S8        |
| Glass/ITO/NiO/Si <sub>3</sub> N <sub>4</sub> /Li <sub>x</sub> Mg <sub>y</sub> N/WO <sub>3</sub> /ITO                                 | NG              | 40*                  | 77                      | S9        |
| Glass/ITO/NiO:(Li,Mg)/Ta <sub>2</sub> O <sub>5</sub> /WO <sub>3</sub> /ITO                                                           | NG              | 58                   | NG                      | S10       |
| Glass/ITO/NiO <sub>x</sub> /ZrO <sub>2</sub> :H/WO <sub>3</sub> /ITO                                                                 | 25 / 15         | 65.2                 | NG                      | S11       |
| Glass/ITO/WO <sub>3</sub> /LiNbO <sub>3</sub> /NiO <sub>x</sub> /ITO                                                                 | 45 / 25         | 65                   | NG                      | S12       |
| Glass/ITO/NiO <sub>x</sub> /LiTaO <sub>3</sub> /WO <sub>3</sub> /ITO                                                                 | 85 / 42         | 67                   | NG                      | S13       |
| Glass/ITO/WO <sub>3</sub> /LiPON/NiO/ITO                                                                                             | within 30       | 40                   | NG                      | S14       |
| Glass/ITO/NiO/LTO/WO <sub>3</sub> /ITO                                                                                               | within 30       | 40                   | NG                      | S15       |
| Glass/ITO/WO <sub>3</sub> /LiNbO <sub>3</sub> /Ta <sub>2</sub> O <sub>5</sub> /NiO/ITO                                               | NG              | 31.4                 | NG                      | S16       |
| Glass/ITO/ dry lithiated WO <sub>3</sub> /wet lithiated Ta <sub>2</sub> O <sub>5</sub> /NiO/ITO                                      | 10 / 7          | 71.7                 | NG                      | S17       |
| Glass/TCO/V <sub>2</sub> O <sub>5</sub> /LiPON/Li <sub>x</sub> WO <sub>3</sub> /TCO                                                  | within 30       | 40                   | NG                      | S18       |
| Glass/ITO/WO <sub>3</sub> /LiF/NiO/ITO                                                                                               | 9.6 / 4.0       | 58.9                 | 88.5                    | this work |

\* represent the average visible light transmittances modulation; NG refers to not available data.

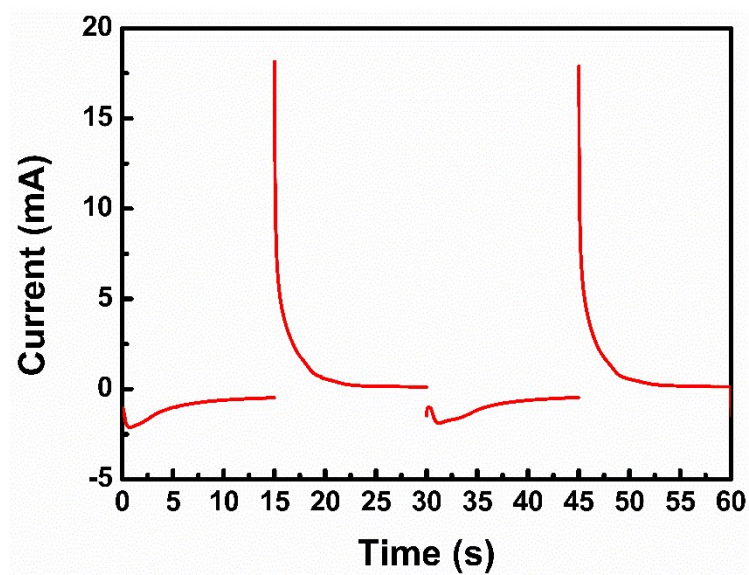

Figure S4 The first two cycles full coloring /bleaching CA curves.



## REFERENCES

- (S1) H. Yang, C. Wang, X. Diao, H. Wang, T. Wang and K. Zhu, *J. Phys. D. Appl. Phys.*, 2008, **41**, 115301.
- (S2) H. G. Yang, C. Wang, Y. Cui, K. G. Zhu, X. G. Diao, H. Y. Wang and T. M. Wang, *Mater. Sci. Forum*, 2009, **610**, 610-615.
- (S3) Hai-Gang, Y., Cong, W., Kai-Gui, Z., Xun-Gang, D., Huai-Yi, W., Yi, C. and Tian-Min, W, *Chinese Phys. Lett.*, 2008, **25**, 740-742.
- (S4) Q. Liu, G. Dong, Y. Xiao, F. Gao, M. Wang, Q. Wang, S. Wang, H. Zuo, and X. Diao, *Mater. Lett.*, 2015, **142**, 232-234.
- (S5) Q. Liu, G. Dong, Q. Chen, J. Guo, Y. Xiao, M. P. Delplancke-Ogletree, F. Reniers and X. Diao, *Sol. Energy Mater. Sol. Cells*, 2018, **174**, 545-553.
- (S6) Q. Huang, G. Dong, Y. Xiao and X. Diao, *Electrochim. Acta*, 2017, **252**, 331-337.
- (S7) D. Dong, W. Wang, G. Dong, F. Zhang, Y. He, H. Yu, F. Liu, M. Wang and X. Diao, *Appl. Surf. Sci.*, 2016, **383**, 49-56.
- (S8) D. Dong, W. Wang, G. Dong, Y. Zhou, Z. Wu, M. Wang, F. Liu and X. Diao, *Appl. Surf. Sci.*, 2015, **357**, 799-805.
- (S9) Y. Xiao, G. Dong, Q. Huang, Q. Liu, J. Guo, J. Liu, J. Zhang and X. Diao, *J. Solid State Electrochem.*, 2018, **22**, 275-283.
- (S10) D. Dong, W. Wang, A. Barnabé, L. Presmanes, A. Rougier, G. Dong, F. Zhang, H. Yu, Y. He and X. Diao, *Electrochim. Acta*, 2018, **263**, 277-285.
- (S11) Y. Zhou, X. Diao, G. Dong, Z. Wu, D. Dong and M. Wang, *Ionics*, 2016, **22**, 25-32.
- (S12) Z. Wu, X. Diao and G. Dong, *Proc. of SPIE*, 2016, **9796**, 1-7.
- (S13) X. Song, G. Dong, F. Gao, Y. Xiao, Q. Liu and X. Diao, *Vacuum*, 2015, **111**, 48-54.

- (S14) Y. Xiao, X. Zhong, J. Guo, C. Zhou, H. Zuo, Q. Liu, Q. Huang, Q. Zhang and X. Diao, *Electrochim. Acta*, 2018, **260**, 254-263.
- (S15) Y. Xiao, G. Dong, J. Guo, Q. Liu, Q. Huang, Q. Zhang, X. Zhong and X. Diao, *Sol. Energy Mater. Sol. Cells*, 2018, **179**, 319-327.
- (S16) G. Atak and Ö. D. Coşkun, *Opt. Mater.*, 2018, **82**, 160-167.
- (S17) Ö. D. Coşkun and G. Atak, *Thin Solid Films*, 2018, **662**, 13-20.
- (S18) S. Oukassi, C. Giroud-Garampon, C. Dubarry, C. Ducros and R. Salot, *Sol. Energy Mater. Sol. Cells*, 2016, **145**, 2-7.
